# Supplementary material for: Vaccination against COVID-19: Factors That Influence Vaccine Hesitancy among an Ethnically Diverse Community in the UK
Source: MDPI journal article supplement (doi:10.3390/vaccines10010106), 2022-01-11
Supplement: s1 [file s1]

**Table S2.** Coding system – What would change your mind (about getting vaccinated)

|                    | <b>Codes</b>                                                                      | <b>Definition</b>                                                                                                   |
|--------------------|-----------------------------------------------------------------------------------|---------------------------------------------------------------------------------------------------------------------|
| <b>Health</b>      |                                                                                   |                                                                                                                     |
| 1                  | If the vaccine does not affect fertility                                          | If vaccine does not affect fertility in young people (or others)                                                    |
| 2                  | Vaccine to provide 100% protection                                                | 100% effectiveness                                                                                                  |
| 3                  | If effects of vaccine are not passed on through breast feeding                    | If effects of vaccine do not pass on through breast feeding or affect baby                                          |
| <b>Information</b> |                                                                                   |                                                                                                                     |
| 4                  | Evidence to back up claims                                                        | Evidence or data to support claims. More research. Standard trials. FDA <sup>1</sup> approval.                      |
| 5                  | Information on long-term side effects of vaccine                                  | Evidence on long-term effects.                                                                                      |
| 10                 | Knowing my legal rights <sup>1a</sup>                                             |                                                                                                                     |
| <b>Other</b>       |                                                                                   |                                                                                                                     |
| 6                  | Someone from my family or high profile <sup>a</sup> not experiencing side effects | If I witness someone in my family/close circle of friends who has had the vaccine and not experienced side effects. |
| 7                  | Access to vaccines abroad                                                         | Better access to vaccines abroad (e.g., international students)                                                     |
| 8                  | It depends on means of persuasion                                                 |                                                                                                                     |
| 9                  | If made compulsory                                                                | If mandatory. By law. If penalties are introduced.                                                                  |
| 10                 | Knowing my legal rights <sup>a</sup>                                              |                                                                                                                     |
| 11                 | No suggestion <sup>1 a</sup>                                                      |                                                                                                                     |

<sup>a</sup> Modified at the end of stage 2 (as a result of discussions over discrepancies)

---

<sup>1</sup> These were new codes added as part of the Stage 2 of analysis; <sup>a</sup> Modified at the end of stage 2 (as a results of discussion over discrepancies)
