# Supplementary material for: Vaccination against COVID-19: Factors That Influence Vaccine Hesitancy among an Ethnically Diverse Community in the UK
Source: MDPI journal article supplement (doi:10.3390/vaccines10010106), 2022-01-11
Supplement: s1 [file s1]

**Table S1. Coding System– Reasons for not getting vaccinated**

|                              | <b>Codes</b>                                                 | <b>Definition</b>                                                                                       |
|------------------------------|--------------------------------------------------------------|---------------------------------------------------------------------------------------------------------|
| <b>Attitudes and beliefs</b> |                                                              |                                                                                                         |
| 1                            | Lack of trust in government                                  | Lack of trust or mistrust. Lies. Government wants to control individuals and communities.               |
| 2                            | Lots of vaccinated people die                                | Lots of people die despite having been vaccinated.                                                      |
| 3                            | Lack of trust in the vaccine                                 | Vaccines have been rushed. They have not gone through all the trails. I don't trust it                  |
| 4                            | Vaccines do not have 100% effectiveness                      | No vaccine provides total protection. Low effectiveness of some vaccines.                               |
| <b>Health</b>                |                                                              |                                                                                                         |
| 5                            | Sides effects of vaccines                                    | Many people experience side effects after having the vaccine. Possible effects on fertility             |
| 6                            | I don't need it <sup>1a</sup>                                | I have good health, don't need it. I am not in danger. I am immune.                                     |
| <b>Information</b>           |                                                              |                                                                                                         |
| 7                            | Lack of sufficient evidence of long-term effects of vaccines | Not enough evidence of possible harm to human health.                                                   |
| <b>Other</b>                 |                                                              |                                                                                                         |
| 8                            | No clear reason                                              | My reasons are private/personal choice. I don't want it. I need more time. I am not sure <sup>d</sup> . |
| 9                            | Health conditions <sup>1b</sup>                              | Pregnancy                                                                                               |
| 10                           | Heard immunity <sup>1b</sup>                                 | I will wait until there is herd immunity.                                                               |
| 11                           | Fear of injections <sup>1b</sup>                             | I am afraid of injections/needles                                                                       |

<sup>a</sup> Modified at the end of stage 2 (as a result of discussions over discrepancies), <sup>b</sup> Modified at the end of stage 3.
